# Supplementary material for: Selective hydrogenation of lignin-derived compounds under mild conditions
Source: Royal Society of Chemistry journal article supplement (doi:10.1039/d0gc00121j), 2020-01-01
Supplement: d0gc00121j1.pdf [file d0gc00121j1.pdf]

## SUPPORTING INFORMATION

---

### Supporting Information

## Selective hydrogenation of lignin-derived compounds under mild conditions

Lu Chen, Antoine P. van Muyden, Xinjiang Cui, Gabor Laurenczy\* and Paul J. Dyson\*

DOI: 10.1039/x0xx00000x

### Table Contents

|                                                                                                          |    |
|----------------------------------------------------------------------------------------------------------|----|
| Experimental .....                                                                                       | 2  |
| Figure S1. SEM and TEM images of the Rh-H catalysts .....                                                | 3  |
| Figure S2. X-ray photoelectron spectroscopy (XPS) of the Rh-H catalyst. ....                             | 4  |
| Figure S3. Powder X-ray diffraction (XRD) profiles of the catalysts with different N-doping agents. .... | 5  |
| Figure S4. N <sub>2</sub> physisorption isotherms of Rh-H .....                                          | 5  |
| Figure S5. Recycling experiments. ....                                                                   | 6  |
| Figure S6. TEM images and size distribution of the Rh/C .....                                            | 7  |
| Figure S7. TEM images and size distribution of the Ni/C .....                                            | 8  |
| Figure S8. XRD of the Rh/C, Ru/C, Pt/C, Pd/C and Ni/C .....                                              | 9  |
| Table S1. Hydrogenations of lignin dimer model compounds using Rh-H in H <sub>2</sub> O .....            | 10 |

## SUPPORTING INFORMATION

---

### Experimental

#### Synthesis of the catalysts

In a typical experiment, 2,4-dihydroxybenzoic acid (DA) (1.0 mmol), hexamethylenetetramine HMT (0.5 mmol) and the N-dopant (0.5 mmol) were dissolved in deionized water (60 ml) to form Solution 1. EO20-PO70-EO20 Pluronic (P123) (0.01 mmol), sodium oleate (SO) (0.25 mmol) and  $\text{RhCl}_3 \cdot 3\text{H}_2\text{O}$  (0.05 mmol) were dissolved in deionized (DI) water (20 mL), to form Solution 2. Next, Solution 2 was added to Solution 1 dropwise, and then the mixture was transferred into a Teflon-lined cell, and loaded into a stainless steel autoclave (120 ml). The autoclave was heated from 30 °C to 160 °C with a heating rate of 1 °C min<sup>-1</sup> and maintained at 160 °C for 4 h. After cooling to room temperature, the solid was separated by centrifugation and washed three times with DI water. The obtained solid was dried under vacuum at 60 °C. The resulting powder was heated from 30 °C to 600 °C at a heating rate of 2 °C min<sup>-1</sup> under an argon atmosphere and maintained at 600 °C for 3 h.

#### Characterizations of catalysts

Transmission electron microscopy (TEM): The catalysts were dispersed in ethanol and ultra-sonicated for 1 h. Subsequently, the ethanol suspension of nanoparticles was deposited on a carbon film coated copper grid and then examined by TEM. (FEI Talos, operated at 200 keV).

Inductively coupled plasma optical emission spectrometry (ICP-OES): The catalyst (5 mg) was digested in aqua regia and then diluted. The ICP-OES test was conducted on an ICP-OES 5110 instrument (Agilent) using standard metal solutions as reference for each measurement. Result: Rh (35225.8 mg/kg)

#### Catalyst Testing

The substrate (1 mmol), catalyst (10 mg), and H<sub>2</sub>O (2.0 g) were introduced into a 20 mL glass vial and loaded in an autoclave (75 ml). After flushing the autoclave with H<sub>2</sub> three times, the autoclave was pressurized to the desired pressure and placed in a heating block maintained at the desired temperature with stirring at 800 rpm. After reaction, the products were extracted with diethyl ether and analysed by gas chromatography-mass spectrometry (GC-MS).

#### Recycling Experiment

The recycling experiments followed the same procedure except a reaction time of 5 h was used. An additional washing step with diethyl ether (3 × 5 mL) was also added. Before each experiment, the solution was ultra-sonicated for 30 s to disperse the catalyst.

## SUPPORTING INFORMATION

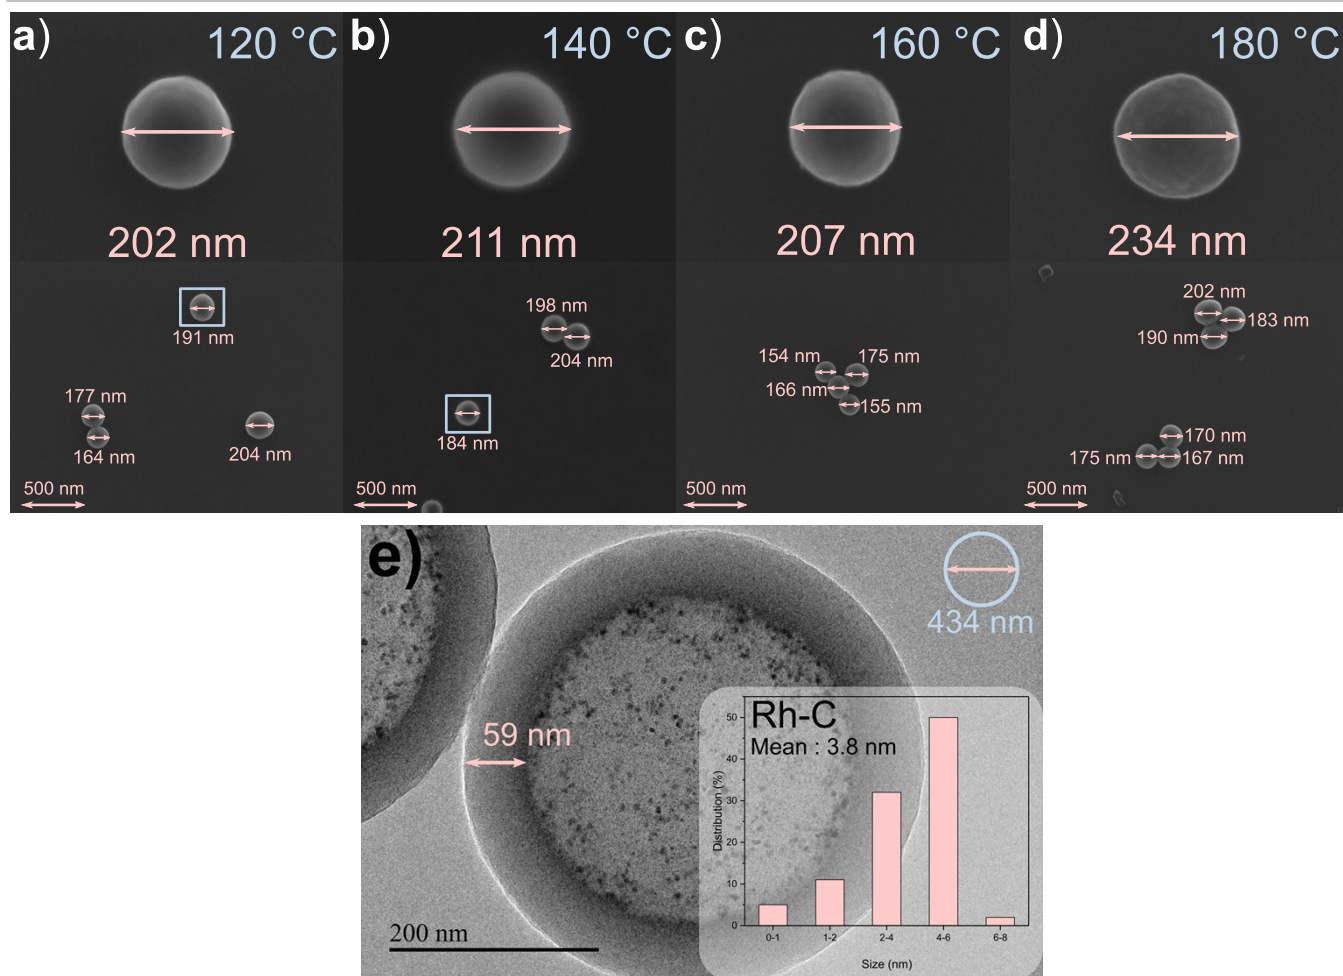

**Figure S1.** SEM images of the Rh-H catalysts obtained at different hydrothermal temperatures, (a) 120 °C, (b) 140 °C, (c) 160 °C, (d) 180 °C. (e) TEM characterization of Rh-C prepared at 160 °C. In the white insert, their corresponding size distribution, their mean diameter as well as the structure of the N-dopant used during the synthesis. The blue circle represents the average outer diameter of the carbon support. The pink scale represents the average thickness of the shell.

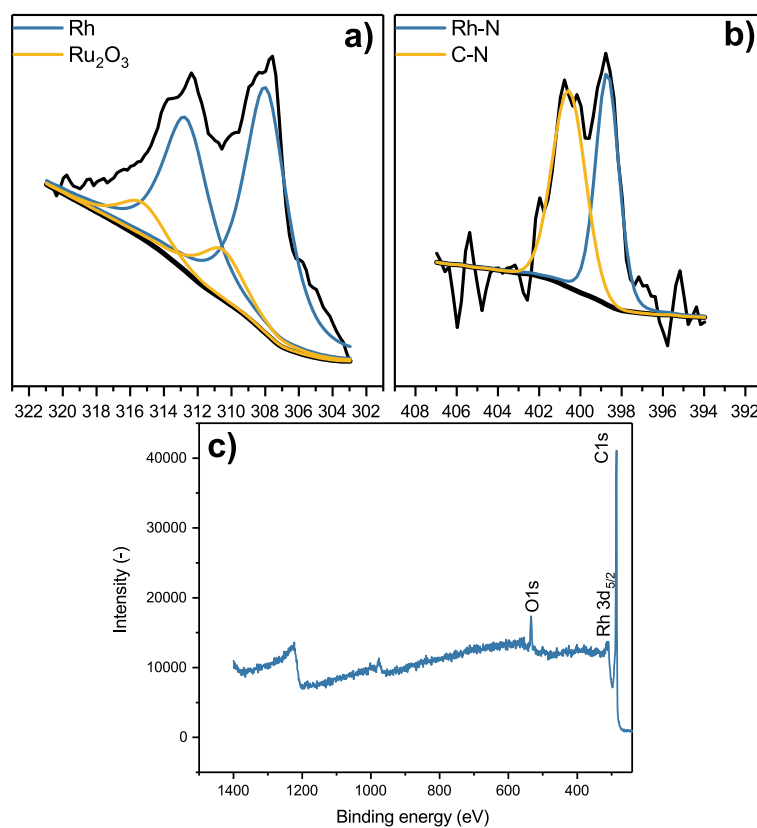

**Figure S2.** X-ray photoelectron spectroscopy (XPS) of the Rh-H catalyst. (a) Rh 3d<sub>5/2</sub> region (b) N 1s region (c) Survey.

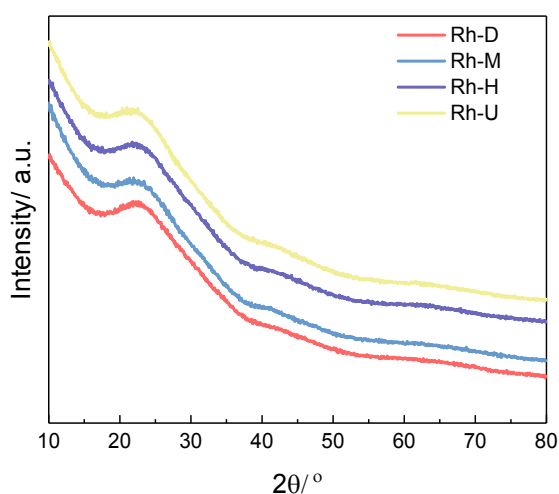

**Figure S3.** Powder X-ray diffraction (XRD) profiles of the catalysts with different N-doping agents.

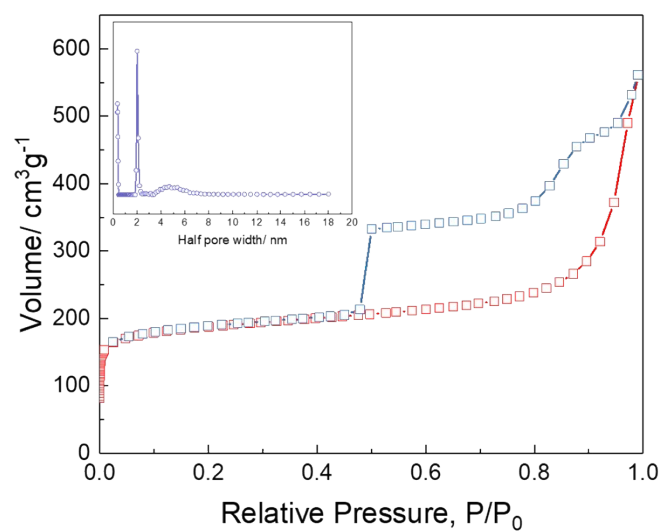

**Figure S4.** N<sub>2</sub> physisorption isotherms of Rh-H. The specific surface areas of 540 m<sup>2</sup>/g, and the mean diameter of pores 4 nm. The pore size distribution curves were obtained by analysing the isotherm desorption branch using the Barrett–Joyner–Halenda (BJH) model.

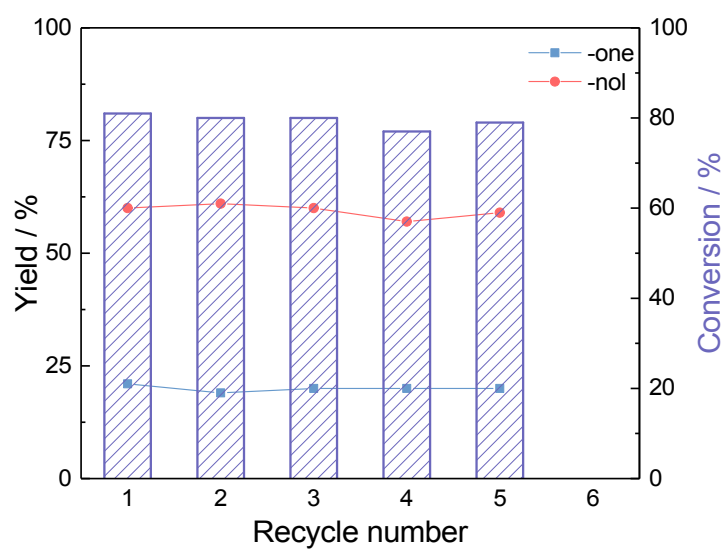

**Figure S5.** Recycling experiments. Reaction conditions: phenol (1.0 mmol), Rh-H (10 mg), H<sub>2</sub>O (2.0 g) 5 bar H<sub>2</sub>, 30 °C, 4 h.

## SUPPORTING INFORMATION

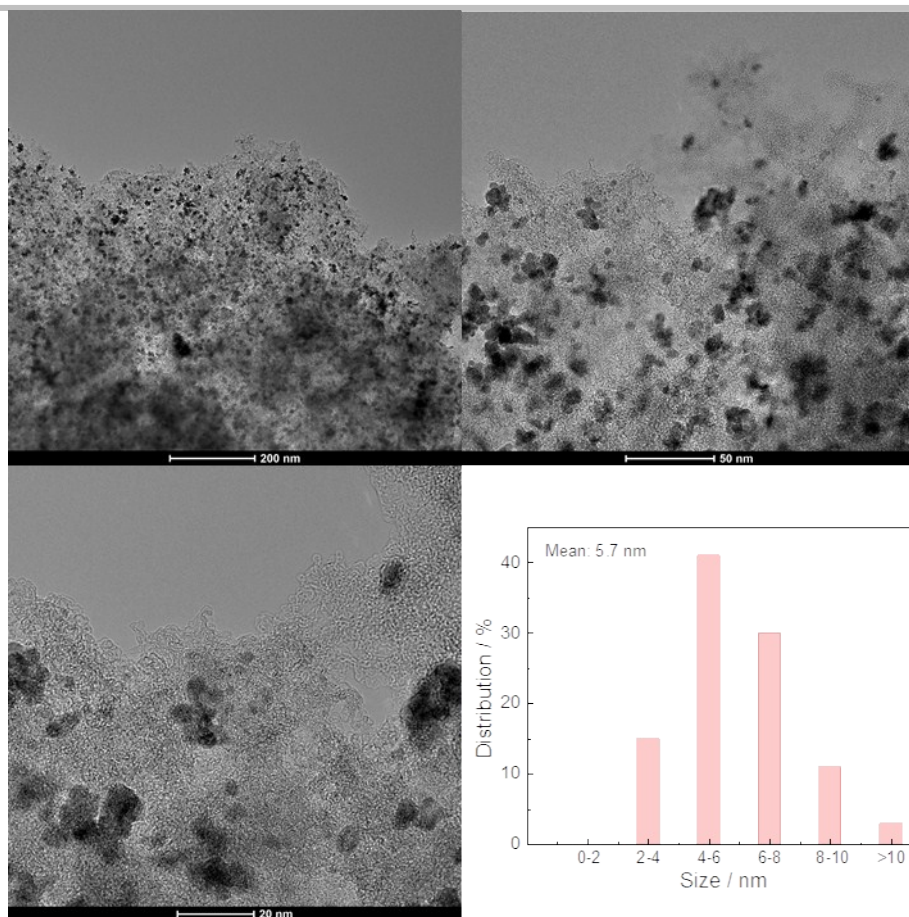

**Figure S6.** TEM images and size distribution of the Rh/C.

## SUPPORTING INFORMATION

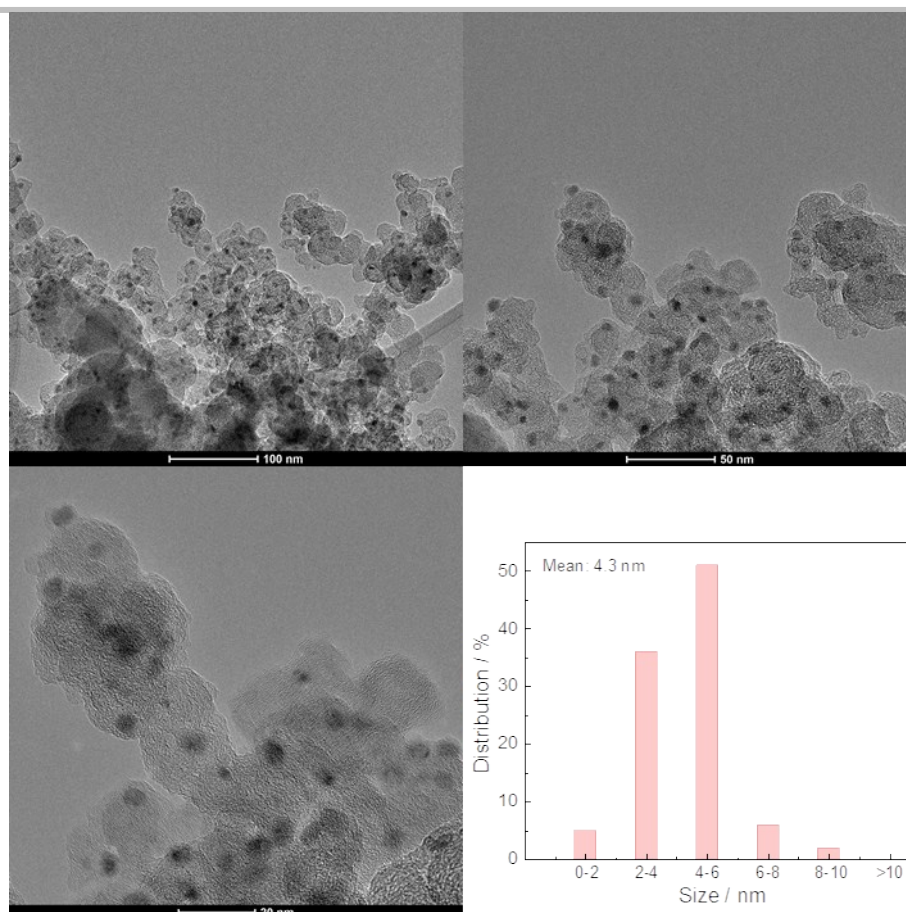

**Figure S7.** TEM images and size distribution of the Ni/C.



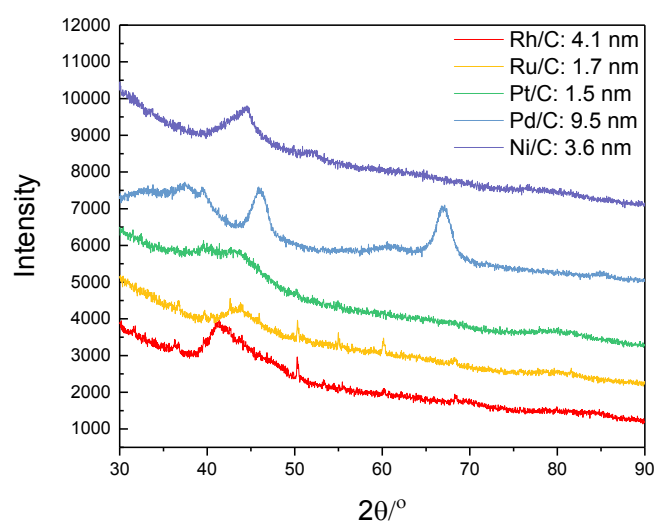

**Figure S8.** XRD of the Rh/C, Ru/C, Pt/C, Pd/C and Ni/C.

# SUPPORTING INFORMATION

Table S1. Hydrogenations of lignin dimer model compounds using Rh-H in H<sub>2</sub>O.

| Entry           | Substrate                                                                                       | Conversion % | Products (Yield %)                                                                       |                                                                                          |                                                                                           |                                                                                          |
|-----------------|-------------------------------------------------------------------------------------------------|--------------|------------------------------------------------------------------------------------------|------------------------------------------------------------------------------------------|-------------------------------------------------------------------------------------------|------------------------------------------------------------------------------------------|
| 1               | 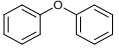 4-O-5         | 100          |  (82)   |  (18)  | -                                                                                         | -                                                                                        |
| 2               |                | 100          |  (85)   |  (7.5) |  (7.5) | -                                                                                        |
| 3               |                | 100          |  (85)   |  (15)  | -                                                                                         | -                                                                                        |
| 4               |                | 95           |  (90)   |  (5)   |  (5)   | -                                                                                        |
| 5               |                | 100          |  (98)   |  (2)   | -                                                                                         | -                                                                                        |
| 6               |  $\alpha$ -O-4 | 83           |  (21)   |  (15)  |  (24)  |  (23) |
| 7 <sup>a</sup>  |  $\alpha$ -O-4 | 98           |  (45)   |  (26)  |  (25)  |  (2)  |
| 8               |  $\beta$ -O-4  | 84           |  (67)   |  (17)  | -                                                                                         | -                                                                                        |
| 9 <sup>a</sup>  |  $\beta$ -5    | 80           |  (77)   |  (3)   | -                                                                                         | -                                                                                        |
| 10 <sup>a</sup> |                | 79           |  (76)   |  (3)   | -                                                                                         | -                                                                                        |
| 11 <sup>a</sup> |  $\beta$ -5    | 100          |  (75)   |  (25)  | -                                                                                         | -                                                                                        |
| 12              |  $\alpha$ -1  | 100          |  (98)  |  (2)  | -                                                                                         | -                                                                                        |
| 13              |  5-5         | 100          |  (98) |  (2) | -                                                                                         | -                                                                                        |

Reaction conditions: phenol (1.0 mmol), Rh-H (20 mg), H<sub>2</sub>O (2.0 g) 15 bar H<sub>2</sub>, 80 °C, 24 h. Conversion and yields determined by GC.  
[a] 100 °C.
